# Supplementary material for: Gravitational Dose‐Response Curves for Acute Cardiovascular Hemodynamics and Autonomic Responses in a Tilt Paradigm
Source: PubMed Central journal article supplement — J Am Heart Assoc. 2022 Jul 5;11(14):e024175. doi: 10.1161/JAHA.121.024175 (PMC9707822; doi:10.1161/jaha.121.024175), 2022-07-05
Supplement: JAH3-11-e024175-s001.pdf [file JAH3-11-e024175-s001.pdf]

# **SUPPLEMENTAL MATERIAL**

Table S1. Estimated model coefficients for the gravitational dose-response curves displayed in Figures 4 and 5 generated by linear mixed models (LMMs) and generalized linear mixed models (GLMMs). Estimated coefficients are presented as mean  $\pm$  SE. Only significant terms were included in the models.

|                                            | Model <sup>†</sup> | Link <sup>‡</sup> | Units           | Estimated Coefficients <sup>§</sup> |                                               |                                    | Std Dev of Random Effect <sup>††</sup> |
|--------------------------------------------|--------------------|-------------------|-----------------|-------------------------------------|-----------------------------------------------|------------------------------------|----------------------------------------|
|                                            |                    |                   |                 | $\beta_0$<br>Intercept              | $\beta_1$<br>$\sin(\text{Angle})^{\parallel}$ | $\beta_2$<br>Position <sup>¶</sup> |                                        |
| <b>Hemodynamic Measurements:</b>           |                    |                   |                 |                                     |                                               |                                    |                                        |
| <b>HR</b>                                  | LMM                | $\mu = \eta$      | bpm             | 71.4 $\pm$ 2.0                      | 12.4 $\pm$ 1.1                                | 5.6 $\pm$ 0.7                      | 6.6                                    |
| <b>SV</b>                                  | LMM                | $\mu = \eta$      | ml              | 75.3 $\pm$ 3.1                      | -29.3 $\pm$ 1.6                               | -8.8 $\pm$ 1.6                     | 9.9                                    |
| <b>CO</b>                                  | LMM                | $\mu = \eta$      | l/min           | 5.20 $\pm$ 0.19                     | -1.30 $\pm$ 0.10                              | -0.19 $\pm$ 0.10                   | 0.61                                   |
| <b>TPR</b>                                 | LMM                | $\mu = \eta$      | mmHg.s/ml       | 1.13 $\pm$ 0.04                     | 0.41 $\pm$ 0.03                               | 0.07 $\pm$ 0.03                    | 0.12                                   |
| <b>SBP</b>                                 | LMM                | $\mu = \eta$      | mmHg            | 124.0 $\pm$ 1.9                     | 4.1 $\pm$ 1.5                                 | -                                  | 6.0                                    |
| <b>DBP</b>                                 | LMM                | $\mu = \eta$      | mmHg            | 76.7 $\pm$ 1.2                      | 7.8 $\pm$ 1.1                                 | -                                  | 3.6                                    |
| <b>RPP</b>                                 | LMM                | $\mu = \eta$      | mmHg/min        | 8477 $\pm$ 239                      | 1638 $\pm$ 145                                | 486 $\pm$ 140                      | 752                                    |
| <b>VO2</b>                                 | LMM                | $\mu = \eta$      | l/min           | 0.23 $\pm$ 0.02                     | -                                             | 0.04 $\pm$ 0.01                    | 0.05                                   |
| <b>Time-Domain Autonomic Indices:</b>      |                    |                   |                 |                                     |                                               |                                    |                                        |
| <b>SDNN</b>                                | GLMM               | $\ln(\mu) = \eta$ | ms              | 3.928 $\pm$ 0.096                   | -0.300 $\pm$ 0.037                            | -                                  | 0.148                                  |
| <b>RMSSD</b>                               | GLMM               | $\ln(\mu) = \eta$ | ms              | 3.399 $\pm$ 0.148                   | -0.559 $\pm$ 0.044                            | -0.147 $\pm$ 0.041                 | 0.213                                  |
| <b>HRVTi</b>                               | GLMM               | $\ln(\mu) = \eta$ | -               | 2.419 $\pm$ 0.083                   | -0.199 $\pm$ 0.037                            | -                                  | 0.131                                  |
| <b>BRS</b>                                 | GLMM               | $\ln(\mu) = \eta$ | ms/mmHg         | 2.422 $\pm$ 0.104                   | -0.631 $\pm$ 0.054                            | -                                  | 0.184                                  |
| <b>Frequency-Domain Autonomic Indices:</b> |                    |                   |                 |                                     |                                               |                                    |                                        |
| <b>LF</b>                                  | GLMM               | $\ln(\mu) = \eta$ | ms <sup>2</sup> | 6.564 $\pm$ 0.125                   | -0.326 $\pm$ 0.074                            | -                                  | 0.238                                  |
| <b>HF</b>                                  | GLMM               | $\ln(\mu) = \eta$ | ms <sup>2</sup> | 5.470 $\pm$ 0.243                   | -1.080 $\pm$ 0.100                            | -                                  | 0.490                                  |
| <b>LFNorm</b>                              | LMM                | $\mu = \eta$      | -               | 73.6 $\pm$ 2.4                      | 13.1 $\pm$ 1.6                                | -                                  | 7.8                                    |
| <b>HFNorm</b>                              | LMM                | $\mu = \eta$      | -               | 26.4 $\pm$ 2.4                      | -13.1 $\pm$ 1.6                               | -                                  | 7.8                                    |
| <b>LF/HF</b>                               | GLMM               | $\ln(\mu) = \eta$ | -               | 1.198 $\pm$ 0.129                   | 0.634 $\pm$ 0.078                             | -                                  | 0.268                                  |

Notes:

<sup>†</sup>All models use a linear predictor of the form:  $\eta_{ij} = \beta_0 + \beta_1 \sin(\text{Angle}) + \beta_2 (\text{Position}_j) + \gamma_i + \varepsilon_{ij}$  for subjects  $i$  ( $i = 1 : 12$ ) and position  $j$  ( $j = 0 : 1$ ). All GLMMs have a Gamma distribution.

<sup>‡</sup>Link function between the linear predictor,  $\eta$ , and the expectation of the dependent variable,  $\mu$ .

<sup>§</sup>For GLMMs, coefficients  $\beta$  are given on the scale of the linear predictor for subject  $i$ ,  $\eta_i = \mathbf{X}\beta + \gamma_i$ . The coefficient  $\beta_3$  corresponding to the interaction effect  $\sin(\text{Angle}) \times \text{Position}$  was never significant so was not included in the models or table.

<sup>||</sup>Sine of tilt angle from -0.707 ( $\sin(-45^\circ)$ ) to 0.707 ( $\sin(45^\circ)$ ), positive angles represent head up tilt, negative angles represent head down tilt.

<sup>¶</sup> $\text{Position}_j$ : supine = 0, prone = 1.

<sup>††</sup>Standard deviation,  $\sigma$ , of random intercept,  $\gamma$ , for subject  $i$ .  $\gamma_i \sim N(0, \sigma^2)$ . Units for  $\sigma$  are the same as the estimated coefficients.
